# Supplementary material for: Effects of Medicare Part D on Guideline-Concordant Pharmacotherapy for Bipolar I Disorder Among Dual Beneficiaries
Source: Atypon-hosted journal article supplement (doi:10.1176/appi.ps.201300123), 2013-12-16
Supplement: 323_ds001.pdf [file 323_ds001.pdf]

**Application of sample exclusion criteria applied to 5% U.S. Medicare Sample**


---

|                                                                                                                  |        |
|------------------------------------------------------------------------------------------------------------------|--------|
| Dual beneficiaries nationwide with at least one diagnosis of schizophrenia or bipolar disorder between 2004-2007 | 42,388 |
|------------------------------------------------------------------------------------------------------------------|--------|

---

| <b>Exclusion Criterion</b>                                          | <b>Number Excluded</b> |
|---------------------------------------------------------------------|------------------------|
| Fewer than 10 months of FFS dual enrollment in each study year      | 15,406                 |
| No prescription drug claim 2004-2007                                | 560                    |
| Any institutional stay of $\geq$ 3 months                           | 2,833                  |
| Age $\geq$ 65                                                       | 12,832                 |
| Did not have at least 1 inpatient or 2 outpatient bipolar diagnoses | 7,083                  |
| No diagnosis of bipolar 1 disorder                                  | 185                    |
| Had a diagnosis of schizophrenia                                    | 1,079                  |
| First observed bipolar diagnosis after June 2004                    | 979                    |

---

|              |       |
|--------------|-------|
| Final sample | 1,431 |
|--------------|-------|

---
